# Supplementary material for: Preliminary exploration of endoplasmic reticulum stress transmission in astrocytes and neurons, and its mediators
Source: Research Square preprint supplement (doi:10.21203/rs.3.rs-4694859/v1), 2024-09-12
Supplement: Supplementary file 1 [file 6d2fcee9350253f22f77aefd.pdf]

**Preliminary exploration of endoplasmic reticulum stress transmission in  
astrocytes and neurons, and its mediators**

Yating Ling <sup>1, 2 #</sup>, Muhammad Abid Hayat <sup>1, 3 #</sup>, Xiaorui Lv <sup>3</sup>, Dongdong Niu<sup>3</sup>, Yu Zeng<sup>3</sup>, Yun Qiu <sup>3</sup>, Bo Chen <sup>3</sup>, Jiabo Hu <sup>1, 3\*</sup>

Author Affiliations

<sup>1</sup> Institute of Cerebrovascular Disease, The Affiliated People's Hospital, Jiangsu University, Zhenjiang 212002, China.

<sup>2</sup> Department of Laboratory Medicine, Nanjing Red Cross Blood Center, Nanjing, Jiangsu, 210003, China

<sup>3</sup> Department of Laboratory Medicine, School of Medicine, Jiangsu University, Zhenjiang 212013, China

#These authors contributed equally to this work

Emails & ORCIDS: Yating Ling: [17719450825@163.com](mailto:17719450825@163.com),  
<https://orcid.org/0000-0002-8324-7070>; Muhammad Abid Hayat:  
[abid.hayat@uvas.edu.pk](mailto:abid.hayat@uvas.edu.pk), <https://orcid.org/0000-0002-1109-0764>

City: Zhenjiang Jiangsu, China

\* Corresponding Author

Prof. Jiabo Hu\*, PhD, Department of Laboratory Medicine, School of Medicine, Jiangsu University, Zhenjiang 212013, China.

Email: [hu@ujs.edu.cn](mailto:hu@ujs.edu.cn)

ORCID: <https://orcid.org/0000-0003-1974-984X>

Tel: +86-13852938166

All authors have read the manuscript and have agreed to submit it in its current form for consideration for publication in the journal : Journal of Neuroimmune Pharmacology

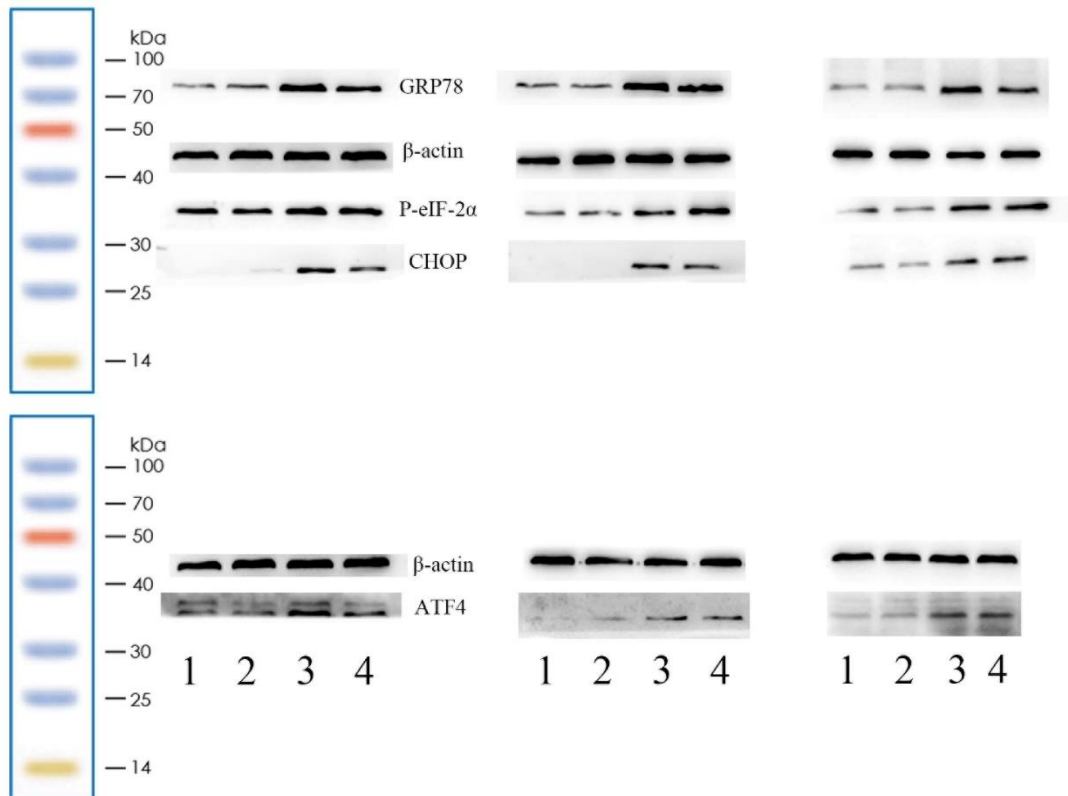

**S1 Figure 1 original data for WB results**

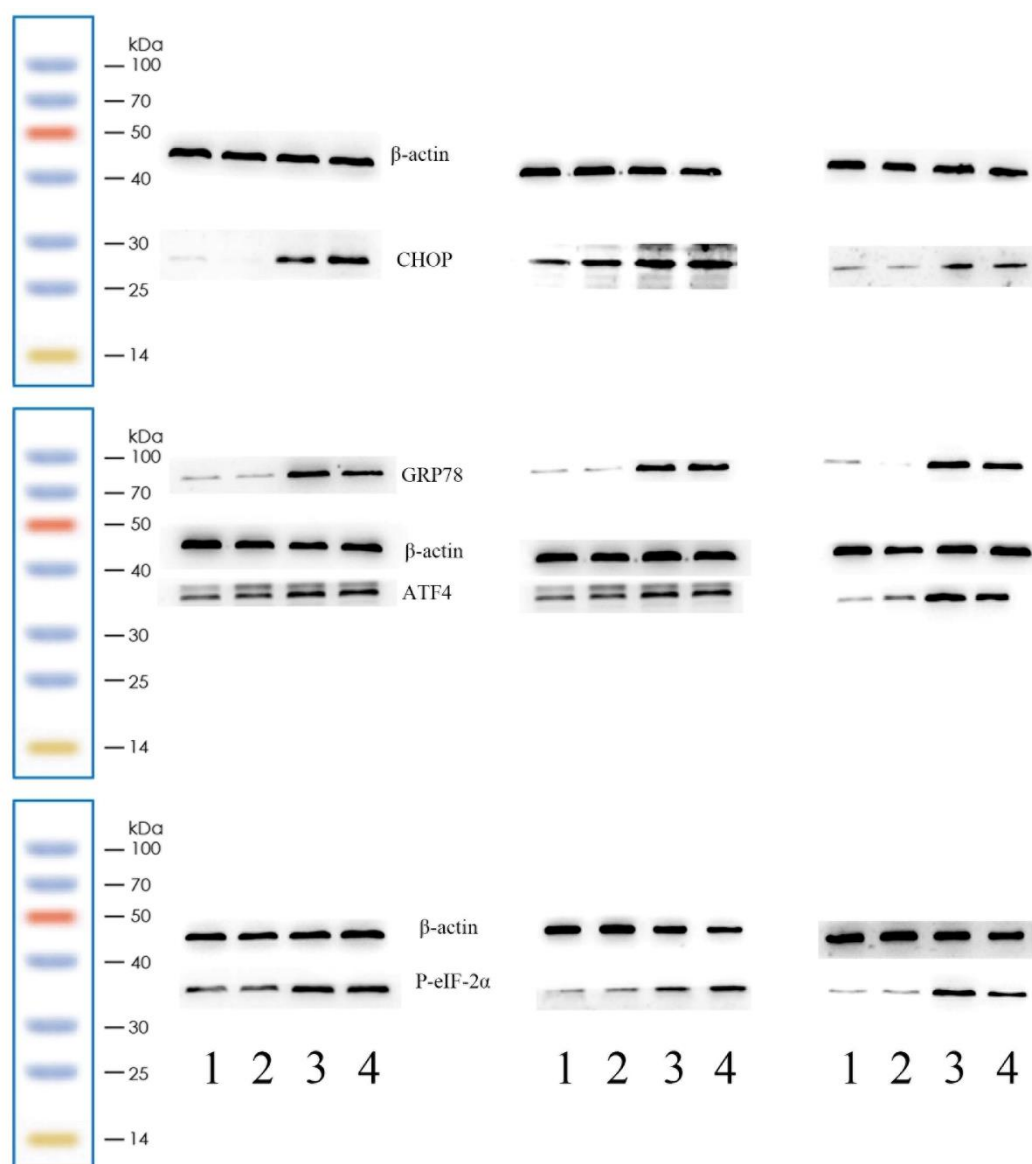

**S2 Figure 2 original data for WB results**

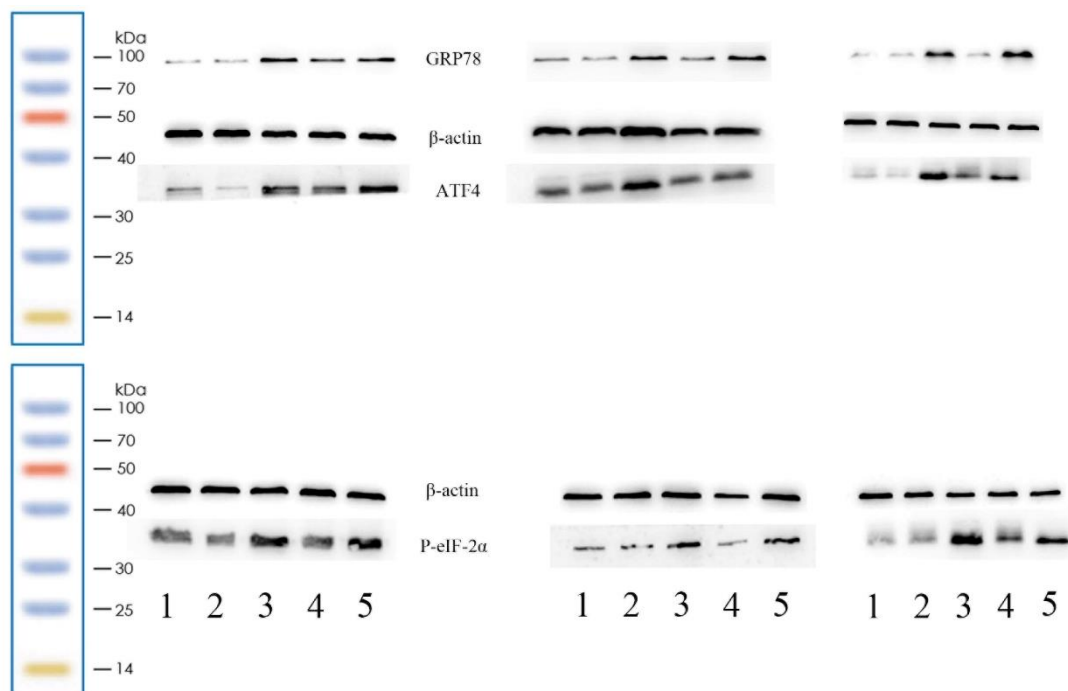

**S3 Figure 5 original data for WB results**
